# Supplementary material for: Medical Management of Constipation in Elderly Patients: Systematic Review
Source: PubMed Central journal article supplement — J Neurogastroenterol Motil. 2021 Oct 30;27(4):495–512. doi: 10.5056/jnm20210 (PMC8521458; doi:10.5056/jnm20210), 2021-10-30
Supplement: jnm-27-4-495-supple.pdf [file jnm-27-4-495-supple.pdf]

**Supplementary Table 1.** Characteristics of Excluded Studies

| No | Study           | Reason for exclusion                                                                     |
|----|-----------------|------------------------------------------------------------------------------------------|
| 1  | Stern 1966      | Medication is not on the list of FDA formulate                                           |
| 2  | MacLennan 1968  | Definition of constipation was not clear                                                 |
| 3  | Williamson 1975 | Full-text article was not available                                                      |
| 4  | Wojcicki 1975   | Full-text article was not available                                                      |
| 5  | Marchesi 1982   | Written in Italy. Full-text article was not available                                    |
| 6  | Doffoel 1990    | Written in French                                                                        |
| 7  | Snustad 1991    | Full-text article was not available                                                      |
| 8  | Ling 1992       | Not a randomize controlled trial                                                         |
| 9  | Teuri 1998      | Not pharmacologic intervention (prebiotics)                                              |
| 10 | Howard 2000     | Not pharmacologic intervention (dietary supplements)                                     |
| 11 | Kim 2005        | Not pharmacologic intervention (abdominal massage)                                       |
| 12 | Wisten 2005     | Not pharmacologic intervention (fruit and fiber)                                         |
| 13 | Bub 2006        | Not pharmacologic intervention (herbal supplements)                                      |
| 14 | Chin 2006       | Not pharmacologic intervention (physical training)                                       |
| 15 | Ueno 2006       | No control arm                                                                           |
| 16 | Hale 2007       | Not pharmacologic intervention (natural mixture)                                         |
| 17 | Pitaka 2007     | Not pharmacologic intervention (fermented cereal)                                        |
| 18 | Sairanen 2007   | Not pharmacologic intervention (yoghurt with prebiotics)                                 |
| 19 | Simon 2009      | Not pharmacologic intervention (behavioral therapy)                                      |
| 20 | Schnelle 2010   | Endpoint was improvement in fecal incontinence<br>Intervention are not clearly described |
| 21 | Huang 2011      | Not pharmacologic intervention (herbal medication)                                       |
| 22 | Marteau 2011    | Not pharmacologic intervention (chicory inulin supplement)                               |
| 23 | Mun 2011        | Not pharmacologic intervention (carbonated water)                                        |
| 24 | Yen 2011        | Not pharmacologic intervention (isomalto-oligosaccharide)                                |
| 25 | Yen 2011        | Not pharmacologic intervention (fructo-oligosaccharide)                                  |
| 26 | Hunag 2012      | Not pharmacologic intervention (herbal medication)                                       |
| 27 | Kondo 2013      | Different inclusion criteria (tube feeding patients)                                     |
| 28 | Li 2014         | Not pharmacologic intervention (auricular pressure)                                      |
| 29 | Yeun 2016       | Not pharmacologic intervention (probiotics)                                              |
| 30 | Konradsen 2017  | Not pharmacologic intervention (home care nursing)                                       |
| 31 | Fang 2017       | Written in Chinese                                                                       |
| 32 | Simon 2017      | Not pharmacologic intervention (biofeedback therapy)                                     |

FDA, Food and Drug Administration.

**Supplementary Table 2.** Quality Assessment for Cross-over Study

| Study                                       | Appropriate cross-over design | Randomized treatment order | Carry-over effect | Unbiased data | Allocation concealment | Blinding | Incomplete outcome data | Selective outcome reporting | Other bias |
|---------------------------------------------|-------------------------------|----------------------------|-------------------|---------------|------------------------|----------|-------------------------|-----------------------------|------------|
| Ewerth et al, <sup>18</sup> 1980            | Low                           | Unclear                    | Low               | Unclear       | High                   | Low      | Low                     | Low                         | Unclear    |
| Cheskin et al, <sup>21</sup> 1995           | Low                           | Unclear                    | Unclear           | Unclear       | High                   | High     | Unclear                 | Low                         | Unclear    |
| Chokhavatia et al, <sup>22</sup> 1988       | Low                           | Unclear                    | Unclear           | Unclear       | Unclear                | High     | Unclear                 | Low                         | Unclear    |
| Vanderdonckt et al, <sup>25</sup> 1990      | Low                           | Unclear                    | Unclear           | Unclear       | High                   | Low      | Unclear                 | Low                         | Unclear    |
| Lederle et al, <sup>27</sup> 1990           | Low                           | Unclear                    | Unclear           | Unclear       | High                   | High     | Low                     | Low                         | Unclear    |
| Hyland and Foran, <sup>30</sup> 1968        | Unclear                       | Unclear                    | Unclear           | High          | High                   | Low      | Low                     | Low                         | Unclear    |
| Kinnunen and Salokannel, <sup>32</sup> 1987 | Low                           | Unclear                    | Unclear           | Unclear       | High                   | Unclear  | Low                     | Low                         | Unclear    |
| Kinnunen et al, <sup>33</sup> 1993          | Low                           | Unclear                    | Unclear           | Low           | High                   | High     | Low                     | Low                         | Unclear    |
| Passmore et al, <sup>34</sup> 1993          | Low                           | Low                        | Unclear           | Unclear       | Unclear                | Low      | Low                     | Low                         | Unclear    |
| Pers and Pers, <sup>35</sup> 1983           | Low                           | Unclear                    | High              | Low           | Unclear                | Unclear  | Low                     | Low                         | Unclear    |

|                     | Random sequence generation (selection bias) | Allocation concealment (selection bias) | Blinding of participants and personnel (performance bias) | Blinding of outcome assessment (detection bias) | Incomplete outcome data (attrition bias) | Selective reporting (reporting bias) | Other bias |
|---------------------|---------------------------------------------|-----------------------------------------|-----------------------------------------------------------|-------------------------------------------------|------------------------------------------|--------------------------------------|------------|
| Camilleri 2009      | ?                                           | ?                                       | +                                                         | ?                                               | +                                        | +                                    | ?          |
| Chassagne 2017      | +                                           | +                                       | ?                                                         | +                                               | ?                                        | +                                    | +          |
| DiPalma 2007        | +                                           | +                                       | +                                                         | +                                               | +                                        | +                                    | +          |
| Fain 1978           | ?                                           | -                                       | -                                                         | -                                               | +                                        | ?                                    | ?          |
| Finlay 1988         | ?                                           | -                                       | -                                                         | -                                               | +                                        | ?                                    | ?          |
| Menees 2020         | +                                           | +                                       | +                                                         | +                                               | +                                        | +                                    | +          |
| Muller-Lissner 2010 | +                                           | +                                       | +                                                         | +                                               | +                                        | +                                    | +          |
| Nakajima 2019       | +                                           | +                                       | +                                                         | +                                               | +                                        | +                                    | +          |
| Rajala 1988         | ?                                           | -                                       | ?                                                         | ?                                               | +                                        | +                                    | ?          |
| Sanders 1978        | ?                                           | -                                       | ?                                                         | -                                               | +                                        | +                                    | ?          |
| Seinela 2009        | ?                                           | ?                                       | +                                                         | +                                               | +                                        | +                                    | +          |
| Ueno 2006           | ?                                           | ?                                       | +                                                         | ?                                               | +                                        | +                                    | +          |
| Wesselius 1968      | ?                                           | ?                                       | +                                                         | ?                                               | +                                        | +                                    | +          |

**Supplementary Figure.** Risk of bias of included studies.
